# Supplementary material
Source: PubMed Central journal article supplement (PMC4468675)
Supplement: AAC.00614-15_zac007154153so1.pdf [file AAC.00614-15_zac007154153so1.pdf]

**SUPPLEMENTAL MATERIAL**

**TABLE S1** Bedaquiline AST results

| Strain                                                                                | Bedaquiline [mg/L] |       |      |     |     |     |     |     |     |     | MIC [mg/L] | Day when growth control was > 400 growth units | MIRU-VNTR |     |     |     |     |     |      |      |      |       |      |      |      |      |      |      |      |      |      |      |      |      |      |      |
|---------------------------------------------------------------------------------------|--------------------|-------|------|-----|-----|-----|-----|-----|-----|-----|------------|------------------------------------------------|-----------|-----|-----|-----|-----|-----|------|------|------|-------|------|------|------|------|------|------|------|------|------|------|------|------|------|------|
|                                                                                       | 0.0125             | 0.025 | 0.05 | 0.1 | 0.2 | 0.4 | 0.8 | 1.6 | 3.2 | 6.4 |            |                                                | 154       | 424 | 577 | 580 | 802 | 960 | 1644 | 1955 | 2059 | 2163b | 2165 | 2347 | 2401 | 2461 | 2531 | 2687 | 2996 | 3007 | 3171 | 3192 | 3690 | 4052 | 4156 | 4348 |
| <b>Reference strain</b>                                                               |                    |       |      |     |     |     |     |     |     |     |            |                                                |           |     |     |     |     |     |      |      |      |       |      |      |      |      |      |      |      |      |      |      |      |      |      |      |
| H37Rv                                                                                 | R                  | R     | R    | R   | R   | S   | S   | S   | S   | S   | 0.4        | 9.5                                            | 2         | 2   | 4   | 3s  | 1   | 3   | 2    | 2    | 2    | 5     | 3    | 4    | 2    | 3    | 6    | 1    | 3    | 3    | 3    | 3    | 5    | 5    | 2    | 2    |
| <b>Treatment-naïve clinical isolates</b>                                              |                    |       |      |     |     |     |     |     |     |     |            |                                                |           |     |     |     |     |     |      |      |      |       |      |      |      |      |      |      |      |      |      |      |      |      |      |      |
| 2014 179741                                                                           | R                  | R     | R    | R   | R   | S   | S   | S   | S   | S   | 0.4        | 8.5                                            | 2         | 3   | 2   | 2   | 3   | 6   | 4    | 4    | 2    | 2     | 4    | 4    | 2    | 2    | 5    | 1    | 5    | 2    | 3    | 5    | 3    | 7    | 4    | 3    |
| 2014 180020                                                                           | R                  | R     | R    | R   | S   | S   | S   | S   | S   | S   | 0.2        | 7                                              | 2         | 4   | 4   | 2   | 3   | 2   | 3    | 5    | 2    | 4     | 4    | 4    | 4    | 2    | 5    | 1    | 7    | 3    | 3    | 5    | 3    | 8    | 2    | 4    |
| 2014 500093                                                                           | R                  | R     | R    | R   | R   | S   | S   | S   | S   | S   | 0.4        | 7.5                                            | 2         | 2   | 3   | 2   | 3   | 3   | 3    | 3    | 2    | 3     | 3    | 4    | 4    | 2    | 5    | 1    | 5    | 3    | 3    | 2    | 3    | 7    | 1    | 2    |
| 2014 180530                                                                           | R                  | R     | R    | R   | R   | R   | S   | S   | S   | S   | 0.8        | 10.5                                           | 2         | 2   | 3   | 2   | 4   | 4   | 3    | 4    | 2    | 5     | 3    | 4    | 4    | 2    | 5    | 1    | 4    | 3    | 2    | 3    | 3    | 8    | 1    | 2    |
| 2014 180401                                                                           | R                  | R     | R    | R   | R   | S   | S   | S   | S   | S   | 0.4        | 8                                              | 2         | 4   | 4   | 2   | 3   | 3   | 3    | 5    | 2    | 5     | 4    | 4    | 4    | 2    | 5    | 1    | 7    | 3    | 3    | 5    | 3    | 8    | 2    | 3    |
| 2013 178018                                                                           | R                  | R     | R    | R   | R   | R   | S   | S   | S   | S   | 0.8        | 9.5                                            | 2         | 2   | 3   | 2   | 3   | 5   | 3    | 3    | 1    | 5     | 2    | 4    | 4    | 2    | 5    | 1    | 5    | 3    | 3    | 4    | 3    | 6    | 3    | 2    |
| 2013 500156                                                                           | R                  | R     | R    | R   | R   | S   | S   | S   | S   | S   | 0.4        | 8.5                                            | 2         | 2   | 4   | 2   | 2   | 3   | 4    | 2    | 2    | 3     | 2    | 4    | 2    | 2    | 5    | 1    | 5    | 3    | 3    | 3    | 3    | 5    | 2    | 2    |
| 2013 177527                                                                           | R                  | R     | R    | R   | R   | S   | S   | S   | S   | S   | 0.4        | 8                                              | 2         | 2   | 5   | 2   | 3   | 3   | 3    | 3    | 2    | 2     | 3    | 4    | 2    | 2    | 5    | 1    | 5    | 2    | 3    | 3    | 4    | 6    | 2    | 2    |
| 2013 177741                                                                           | R                  | R     | R    | R   | R   | R   | S   | S   | S   | S   | 0.8        | 10                                             | 2         | 2   | 3   | 2   | 3   | 3   | 3    | 2    | 2    | 3     | 3    | 4    | 2    | 2    | 6    | 1    | 5    | 3    | 3    | 3    | 3    | 5    | 2    | 2    |
| 2013 177633                                                                           | R                  | R     | R    | R   | R   | R   | S   | S   | S   | S   | 0.8        | 8.5                                            | 2         | 2   | 3   | 2   | 2   | 5   | 3    | 3    | 2    | 6     | 3    | 4    | 4    | 2    | 5    | 1    | 5    | 3    | 3    | 3    | 3    | 4    | 3    | 2    |
| <b>Multidrug-resistant (MDR) clinical isolates (no pretreatment with bedaquiline)</b> |                    |       |      |     |     |     |     |     |     |     |            |                                                |           |     |     |     |     |     |      |      |      |       |      |      |      |      |      |      |      |      |      |      |      |      |      |      |
| 2014 186010                                                                           | nd                 | nd    | nd   | R   | R   | S   | S   | S   | S   | S   | 0.4        | 8                                              | 2         | 1   | 4   | 2   | 2   | 3   | 4    | 2    | 2    | 4     | 2    | 4    | 2    | 2    | 5    | 1    | 5    | 3    | 3    | 4    | 3    | 5    | 2    | 2    |
| 2014 186005                                                                           | nd                 | nd    | nd   | R   | R   | R   | S   | S   | S   | S   | 0.8        | 12                                             | 2         | 4   | 5   | 2   | 3   | 3   | 3    | 5    | 2    | 6     | 2    | 4    | 4    | 2    | 5    | 1    | 5    | 3    | 3    | 5    | 3    | 8    | 2    | 3    |
| 2013 186106                                                                           | nd                 | nd    | nd   | R   | R   | S   | S   | S   | S   | S   | 0.4        | 13                                             | 2         | 4   | 4   | 2   | 2   | 5   | 1    | 3    | 2    | 1     | 3    | 4    | 4    | 2    | 5    | 1    | 1    | 3    | 3    | 4    | 3    | 7    | 3    | 2    |
| 2013 186119                                                                           | R                  | R     | R    | R   | R   | R   | S   | S   | S   | S   | 0.8        | 12                                             | 2         | 4   | 4   | 2   | 3   | 3   | 3    | 3    | 1    | 5     | 4    | 4    | 4    | 1    | 5    | 1    | 7    | 3    | 3    | 5    | 3    | 7    | 4    | 3    |
| 2012 186116                                                                           | R                  | R     | R    | R   | R   | S   | S   | S   | S   | S   | 0.4        | 10                                             | 2         | 2   | 3   | 2   | 2   | 5   | 3    | 3    | 2    | 3     | 3    | 3    | 4    | 2    | 3    | 1    | 5    | 3    | 3    | 3    | 3    | 5    | 2    | 2    |
| 2011 186014                                                                           | R                  | R     | R    | R   | R   | R   | S   | S   | S   | S   | 0.8        | 14                                             | 1         | 3   | 2   | 2   | 5   | 4   | 3    | 3    | 2    | 2     | 2    | 4    | 1    | 2    | 5    | 1    | 5    | 3    | 3    | 2    | 2    | 6    | 2    | 2    |
| 2011 186010                                                                           | R                  | R     | R    | R   | R   | R   | S   | S   | S   | S   | 1.6        | 23                                             | 2         | 4   | 4   | 2   | 3   | 3   | 2    | 8    | 1    | 5     | 4    | 4    | 4    | 2    | 6    | 1    | 5    | 3    | 3    | 5    | 3    | 10   | 5    | 3    |
| 2011 186003                                                                           | R                  | R     | R    | R   | R   | S   | S   | S   | S   | S   | 0.4        | 9                                              | 2         | 4   | 4   | 2   | 3   | 3   | 3    | 5    | 2    | 6     | 3    | 4    | 1    | 2    | 5    | 1    | 5    | 3    | 3    | 2    | 2    | 6    | 2    | 2    |
| 2012 186105                                                                           | R                  | R     | R    | R   | R   | R   | S   | S   | S   | S   | 0.8        | 8                                              | 2         | 5   | 4   | 2   | 1   | 4   | 2    | 3    | 2    | 4     | 2    | 4    | 1    | 1    | 6    | 1    | 5    | 3    | 5    | 3    | 3    | 8    | 2    | 2    |
| 2013 186121                                                                           | R                  | R     | R    | R   | R   | R   | R   | S   | S   | S   | 1.6        | 14                                             | 2         | 2   | 3   | 2   | 0   | 3   | 3    | 2    | 2    | 5     | 2    | 4    | 2    | 2    | 5    | 1    | 4    | 3    | 3    | 3    | 3    | 2    | 2    | 2    |
| 2013 186114                                                                           | R                  | R     | R    | R   | R   | S   | S   | S   | S   | S   | 0.4        | 10.5                                           | 2         | 4   | 4   | 2   | 3   | 3   | 3    | 7    | 2    | 6     | 4    | 4    | 4    | 2    | 5    | 1    | 5    | 3    | 3    | 5    | 3    | 8    | 2    | 3    |
| <b>Extremely-drug resistant (XDR) clinical isolates</b>                               |                    |       |      |     |     |     |     |     |     |     |            |                                                |           |     |     |     |     |     |      |      |      |       |      |      |      |      |      |      |      |      |      |      |      |      |      |      |
| 2011 186000 <sup>†</sup>                                                              | nd                 | nd    | nd   | R   | R   | R   | S   | S   | S   | S   | 0.8        | 18                                             | 2         | 4   | 4   | 2   | 3   | 3   | 2    | 8    | 1    | 5     | 4    | 4    | 4    | 2    | 6    | 1    | 5    | 3    | 3    | 5    | 3    | 10   | 5    | 3    |
| 2013 186116 <sup>**</sup>                                                             | nd                 | nd    | nd   | R   | R   | R   | R   | R   | R   | S   | 6.4        | 10                                             | 2         | 4   | 4   | 2   | 3   | 3   | 2    | 8    | 1    | 5     | 4    | 4    | 4    | 2    | 6    | 1    | 5    | 3    | 3    | 5    | 3    | 10   | 5    | 3    |
| 2014 186023 <sup>**</sup>                                                             | nd                 | nd    | nd   | R   | R   | R   | R   | R   | R   | S   | 6.4        | 23                                             | 2         | 4   | 4   | 2   | 3   | 3   | 2    | 8    | 1    | 5     | 4    | 4    | 4    | 2    | 6    | 1    | 5    | 3    | 3    | 5    | 3    | 10   | 5    | 3    |

nd: not determined

<sup>†</sup> bedaquiline pretreatment-naïve

<sup>\*\*</sup> bedaquiline posttreatment isolate with acquired bedaquiline resistance

**TABLE S2** Delamanid AST results

| Strain                                                                              | Delamanid [mg/L] |        |       |      |      |      |      |      |      | MIC [mg/L] | Day when growth control was > 400 growth units | MIRU-VNTR |     |     |     |     |     |      |      |      |       |      |      |      |      |      |      |      |      |      |      |      |      |      |      |
|-------------------------------------------------------------------------------------|------------------|--------|-------|------|------|------|------|------|------|------------|------------------------------------------------|-----------|-----|-----|-----|-----|-----|------|------|------|-------|------|------|------|------|------|------|------|------|------|------|------|------|------|------|
|                                                                                     | 0.00125          | 0.0025 | 0.005 | 0.01 | 0.02 | 0.04 | 0.08 | 0.16 | 0.32 |            |                                                | 154       | 424 | 577 | 580 | 802 | 960 | 1644 | 1955 | 2059 | 2163b | 2165 | 2347 | 2401 | 2461 | 2531 | 2687 | 2996 | 3007 | 3171 | 3192 | 3690 | 4052 | 4156 | 4348 |
| <b>Reference strain</b>                                                             |                  |        |       |      |      |      |      |      |      |            |                                                |           |     |     |     |     |     |      |      |      |       |      |      |      |      |      |      |      |      |      |      |      |      |      |      |
| H37Rv                                                                               | R                | R      | R     | S    | S    | S    | S    | S    | S    | 0.01       | 9.5                                            | 2         | 2   | 4   | 3s  | 1   | 3   | 2    | 2    | 2    | 5     | 3    | 4    | 2    | 3    | 6    | 1    | 3    | 3    | 3    | 3    | 5    | 5    | 2    | 2    |
| <b>Treatment-naïve clinical isolates</b>                                            |                  |        |       |      |      |      |      |      |      |            |                                                |           |     |     |     |     |     |      |      |      |       |      |      |      |      |      |      |      |      |      |      |      |      |      |      |
| 2013 178018                                                                         | R                | R      | R     | R    | S    | S    | S    | S    | S    | 0.02       | 9.5                                            | 2         | 2   | 3   | 2   | 3   | 5   | 3    | 3    | 1    | 5     | 2    | 4    | 4    | 2    | 5    | 1    | 5    | 3    | 3    | 4    | 3    | 6    | 3    | 2    |
| 2013 500156                                                                         | R                | R      | R     | R    | R    | S    | S    | S    | S    | 0.04       | 8.5                                            | 2         | 2   | 4   | 2   | 2   | 3   | 4    | 2    | 2    | 3     | 2    | 4    | 2    | 2    | 5    | 1    | 5    | 3    | 3    | 3    | 5    | 2    | 2    |      |
| 2013 177527                                                                         | R                | R      | R     | S    | S    | S    | S    | S    | S    | 0.01       | 8                                              | 2         | 2   | 5   | 2   | 3   | 3   | 3    | 2    | 2    | 3     | 4    | 2    | 2    | 5    | 1    | 5    | 2    | 3    | 3    | 4    | 6    | 2    | 2    |      |
| 2013 177741                                                                         | R                | R      | R     | S    | S    | S    | S    | S    | S    | 0.01       | 10                                             | 2         | 2   | 3   | 2   | 3   | 3   | 3    | 2    | 2    | 3     | 3    | 4    | 2    | 2    | 6    | 1    | 5    | 3    | 3    | 3    | 5    | 2    | 2    |      |
| 2013 177633                                                                         | R                | R      | R     | S    | S    | S    | S    | S    | S    | 0.01       | 8.5                                            | 2         | 2   | 3   | 2   | 2   | 5   | 3    | 3    | 2    | 6     | 3    | 4    | 4    | 2    | 5    | 1    | 5    | 3    | 3    | 3    | 4    | 3    | 2    |      |
| 2013 500126                                                                         | R                | R      | S     | S    | S    | S    | S    | S    | S    | 0.005      | 7                                              | 2         | 2   | 4   | 2   | 4   | 3   | 2    | 2    | 2    | 4     | 2    | 4    | 2    | 2    | 5    | 1    | 5    | 3    | 2    | 3    | 3    | 5    | 2    | 2    |
| 2013 500136                                                                         | R                | R      | R     | S    | S    | S    | S    | S    | S    | 0.01       | 7.5                                            | 2         | 2   | 3   | 2   | 3   | 8   | 3    | 6    | 2    | 2     | 3    | 4    | 4    | 2    | 5    | 1    | 6    | 3    | 3    | 4    | 7    | 6    | 3    | 2    |
| 2013 176428                                                                         | R                | R      | R     | S    | S    | S    | S    | S    | S    | 0.01       | 7.5                                            | 2         | 4   | 4   | 2   | 3   | 4   | 3    | 3    | 2    | 2     | 2    | 4    | 2    | 2    | 6    | 1    | 5    | 3    | 3    | 3    | 4    | 4    | 2    | 2    |
| 2013 176598                                                                         | R                | R      | R     | R    | S    | S    | S    | S    | S    | 0.02       | 8                                              | 2         | 3   | 4   | 2   | 4   | 3   | 1    | 2    | 2    | 4     | 3    | 4    | 2    | 2    | 5    | 1    | 4    | 3    | 3    | 3    | 4    | 5    | 2    | 2    |
| 2013 176794                                                                         | R                | R      | R     | R    | S    | S    | S    | S    | S    | 0.02       | 8                                              | 2         | 2   | 4   | 2   | 5   | 3   | 3    | 2    | 2    | 4     | 2    | 4    | 2    | 2    | 5    | 1    | 4    | 3    | 3    | 4    | 3    | 5    | 2    | 2    |
| <b>Multidrug-resistant (MDR) clinical isolates (no pretreatment with delamanid)</b> |                  |        |       |      |      |      |      |      |      |            |                                                |           |     |     |     |     |     |      |      |      |       |      |      |      |      |      |      |      |      |      |      |      |      |      |      |
| 2013 186119                                                                         | R                | R      | R     | R    | R    | S    | S    | S    | S    | 0.04       | 12                                             | 2         | 4   | 4   | 2   | 3   | 3   | 3    | 3    | 1    | 5     | 4    | 4    | 4    | 1    | 5    | 1    | 7    | 3    | 3    | 5    | 3    | 7    | 4    | 3    |
| 2012 186116                                                                         | R                | R      | R     | S    | S    | S    | S    | S    | S    | 0.01       | 10                                             | 2         | 2   | 3   | 2   | 2   | 5   | 3    | 3    | 2    | 3     | 3    | 3    | 4    | 2    | 3    | 1    | 5    | 3    | 3    | 3    | 5    | 2    | 2    |      |
| 2011 186014                                                                         | R                | R      | R     | S    | S    | S    | S    | S    | S    | 0.01       | 14                                             | 1         | 3   | 2   | 2   | 5   | 4   | 3    | 3    | 2    | 2     | 2    | 4    | 1    | 2    | 5    | 1    | 5    | 3    | 3    | 2    | 2    | 6    | 2    | 2    |
| 2011 186010                                                                         | R                | R      | R     | S    | S    | S    | S    | S    | S    | 0.01       | 23                                             | 2         | 4   | 4   | 2   | 3   | 3   | 2    | 8    | 1    | 5     | 4    | 4    | 4    | 2    | 6    | 1    | 5    | 3    | 3    | 5    | 3    | 10   | 5    | 3    |
| 2011 186003                                                                         | R                | R      | R     | S    | S    | S    | S    | S    | S    | 0.01       | 9                                              | 2         | 4   | 4   | 2   | 3   | 3   | 3    | 5    | 2    | 6     | 3    | 4    | 1    | 2    | 5    | 1    | 5    | 3    | 3    | 2    | 2    | 6    | 2    | 2    |
| 2012 186105                                                                         | R                | R      | S     | S    | S    | S    | S    | S    | S    | 0.005      | 8                                              | 2         | 5   | 4   | 2   | 1   | 4   | 2    | 3    | 2    | 4     | 2    | 4    | 1    | 1    | 6    | 1    | 5    | 3    | 5    | 3    | 3    | 8    | 2    | 2    |
| 2013 186121                                                                         | R                | R      | R     | S    | S    | S    | S    | S    | S    | 0.01       | 14                                             | 2         | 2   | 3   | 2   | 0   | 3   | 3    | 2    | 2    | 5     | 2    | 4    | 2    | 2    | 5    | 1    | 4    | 3    | 3    | 3    | 3    | 2    | 2    | 2    |
| 2013 186114                                                                         | R                | R      | R     | S    | S    | S    | S    | S    | S    | 0.01       | 10.5                                           | 2         | 4   | 4   | 2   | 3   | 3   | 3    | 7    | 2    | 6     | 4    | 4    | 4    | 2    | 5    | 1    | 5    | 3    | 3    | 5    | 3    | 8    | 2    | 3    |
| 2013 186101                                                                         | R                | R      | R     | S    | S    | S    | S    | S    | S    | 0.01       | 10                                             | 2         | 4   | 4   | 2   | 3   | 3   | 3    | 5    | 2    | 6     | 4    | 4    | 4    | 2    | 5    | 1    | 5    | 3    | 3    | 5    | 3    | 1    | 2    | 3    |
| 2013 186103                                                                         | R                | R      | R     | S    | S    | S    | S    | S    | S    | 0.01       | 8.5                                            | 2         | 4   | 4   | 2   | 4   | 3   | 3    | 4    | 1    | 4     | 4    | 4    | 4    | 2    | 5    | 1    | 7    | 3    | 3    | 6    | 3    | 7    | 4    | 3    |
| <b>Extremely drug-resistant (XDR) clinical isolates</b>                             |                  |        |       |      |      |      |      |      |      |            |                                                |           |     |     |     |     |     |      |      |      |       |      |      |      |      |      |      |      |      |      |      |      |      |      |      |
| 2014 186009*                                                                        | R                | R      | R     | S    | S    | S    | S    | S    | S    | 0.01       | 30                                             | 2         | 4   | 4   | 2   | 3   | 3   | 2    | 8    | 1    | 5     | 4    | 4    | 4    | 2    | 6    | 1    | 5    | 3    | 3    | 5    | 3    | 10   | 5    | 3    |
| 2014 186011*                                                                        | R                | R      | R     | S    | S    | S    | S    | S    | S    | 0.01       | 31                                             | 2         | 4   | 4   | 2   | 3   | 3   | 2    | 8    | 1    | 5     | 4    | 4    | 4    | 2    | 6    | 1    | 5    | 3    | 3    | 5    | 3    | 10   | 5    | 3    |
| 2014 180114**                                                                       | R                | R      | R     | R    | R    | R    | R    | R    | R    | >0.32      | 25                                             | 2         | 4   | 4   | 2   | 3   | 3   | 2    | 8    | 1    | 5     | 4    | 4    | 4    | 2    | 6    | 1    | 5    | 3    | 3    | 5    | 3    | 10   | 5    | 3    |
| 2014 186023**                                                                       | R                | R      | R     | R    | R    | R    | R    | R    | R    | >0.32      | 38                                             | 2         | 4   | 4   | 2   | 3   | 3   | 2    | 8    | 1    | 5     | 4    | 4    | 4    | 2    | 6    | 1    | 5    | 3    | 3    | 5    | 3    | 10   | 5    | 3    |
| 2014 181148**                                                                       | R                | R      | R     | R    | R    | R    | R    | R    | R    | >0.32      | 20.5                                           | 2         | 4   | 4   | 2   | 3   | 3   | 2    | 8    | 1    | 5     | 4    | 4    | 4    | 2    | 6    | 1    | 5    | 3    | 3    | 5    | 3    | 10   | 5    | 3    |

\* delamanid pretreatment-naïve

\*\* delamanid posttreatment isolate with acquired delamanid resistance

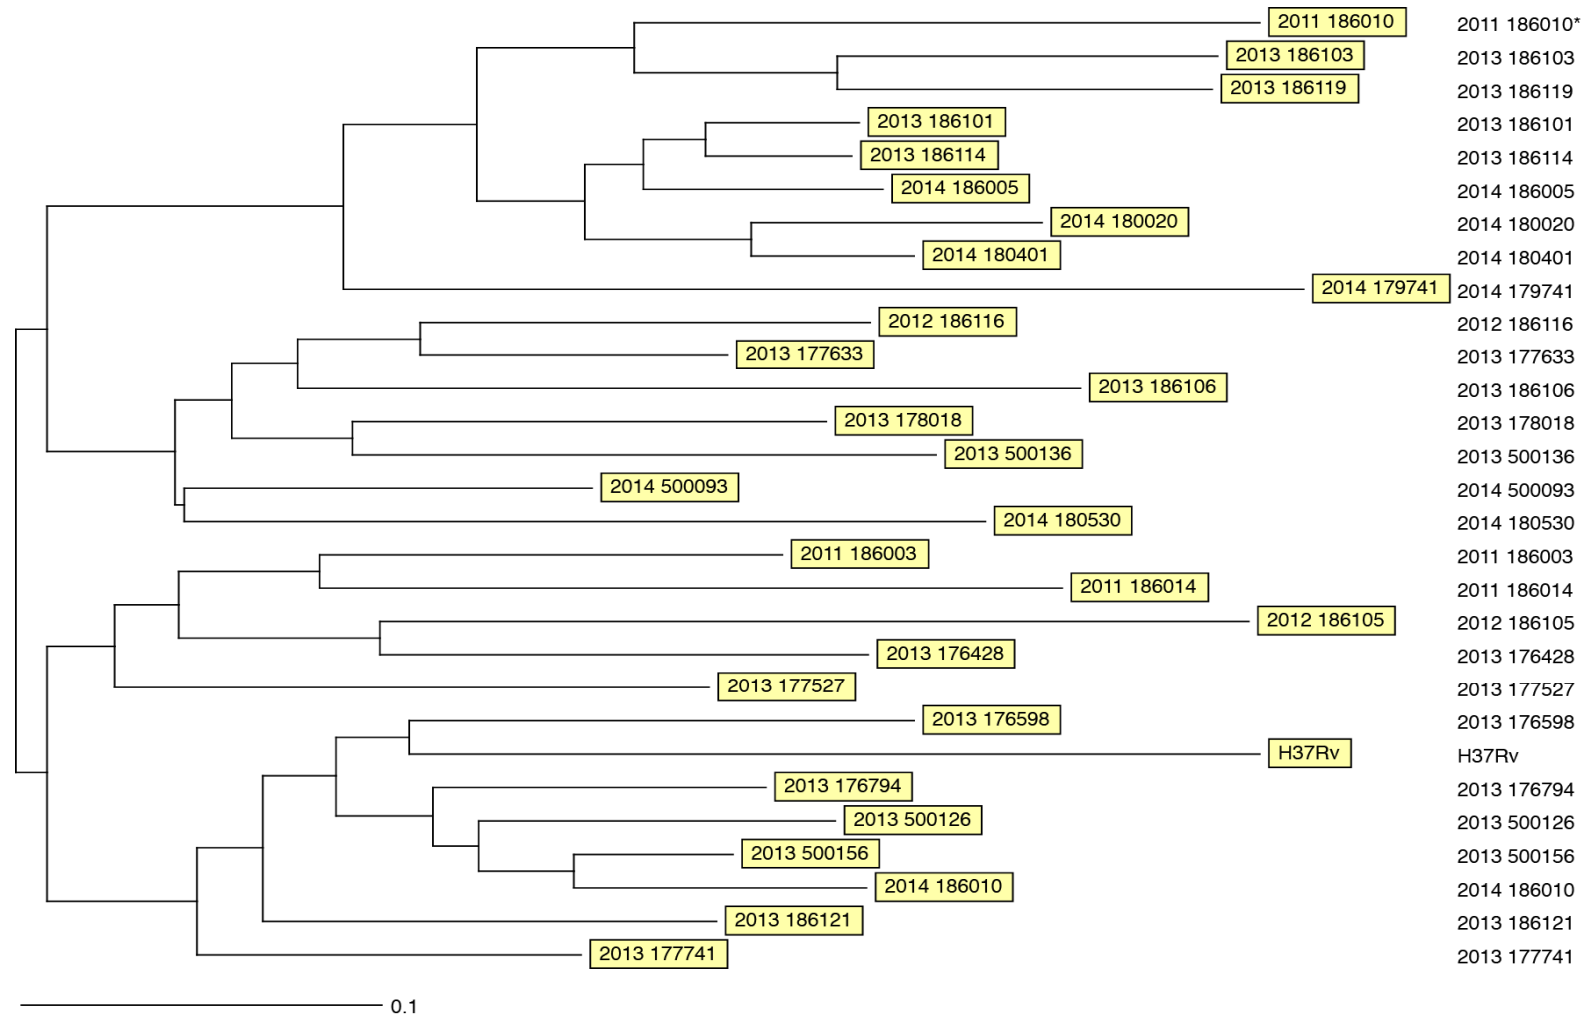

**FIGURE S1** Graphical representation of the relatedness of the strains according to MIRU-VNTR results. The figure contains all strains of the study. The study's XDR strains and one MDR strain share the same MIRU-VNTR pattern (represented by \*). The dendrogram was calculated using the MIRU-VNTRplus web application (<http://www.miru-vntrplus.org/MIRU/index.faces>) and neighbour-joining method (1).

#### Supplementary Literature

1. Saitou N, Nei M. 1987. The neighbor-joining method: a new method for reconstructing phylogenetic trees. *Molecular Biology and Evolution*4:406-425.
